# Supplementary material for: Nutrient Deficiency Promotes the Entry of Helicobacter pylori Cells into Candida Yeast Cells
Source: MDPI journal article supplement (doi:10.3390/biology10050426), 2021-05-12
Supplement: s1 [file s1]

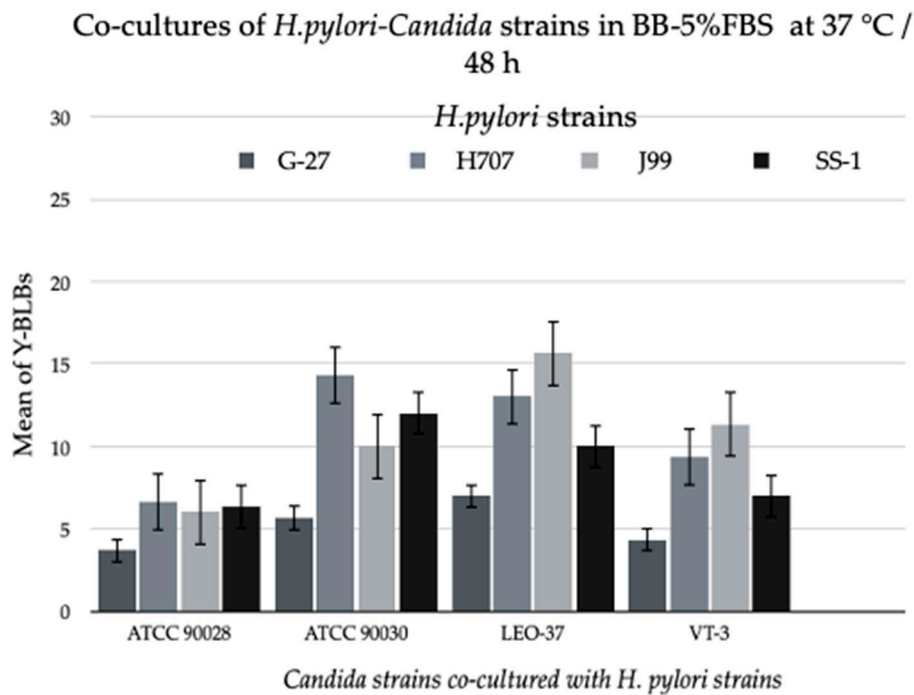

**Supplementary Figure S1.** Means of yeasts cells harboring bacteria like bodies (Y-BLBS) obtained in 48 h co-cultures incubated in Brucella broth supplemented with 5% fetal bovine serum (BB-5%FBS). The higher means of Y-BLBS were found in co-cultures prepared with *Candida* ATCC 90030, LEO-37 and VT-3 strains.

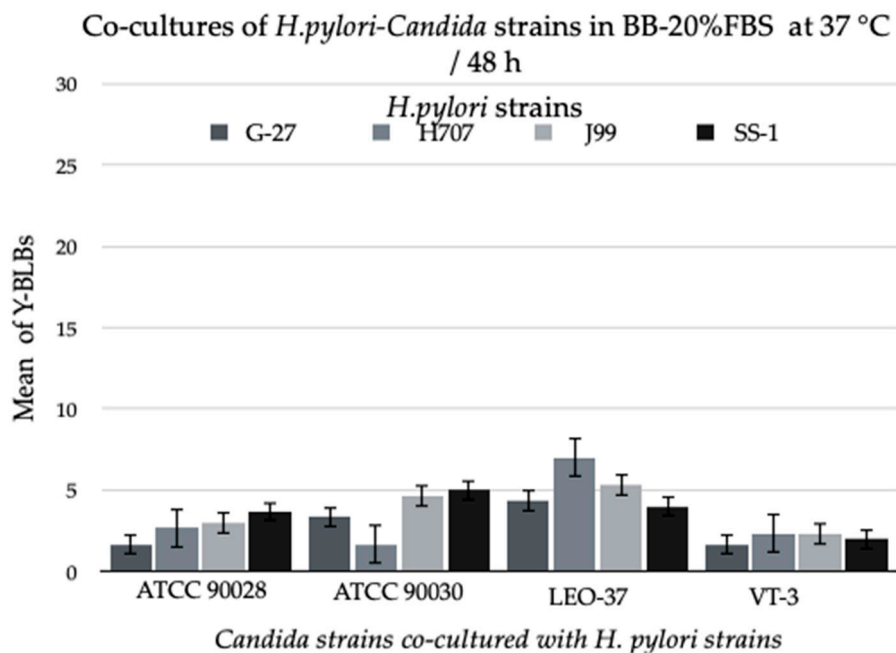

**Supplementary Figure S2.** Means of yeasts cells harboring bacteria like bodies (Y-BLBS) obtained in 48 h co-cultures incubated in Brucella broth supplemented with 20% fetal bovine serum (BB-20%FBS). The higher means of Y-BLBS were found in co-cultures prepared with *Candida* ATCC 90030 and LEO-37 strains.

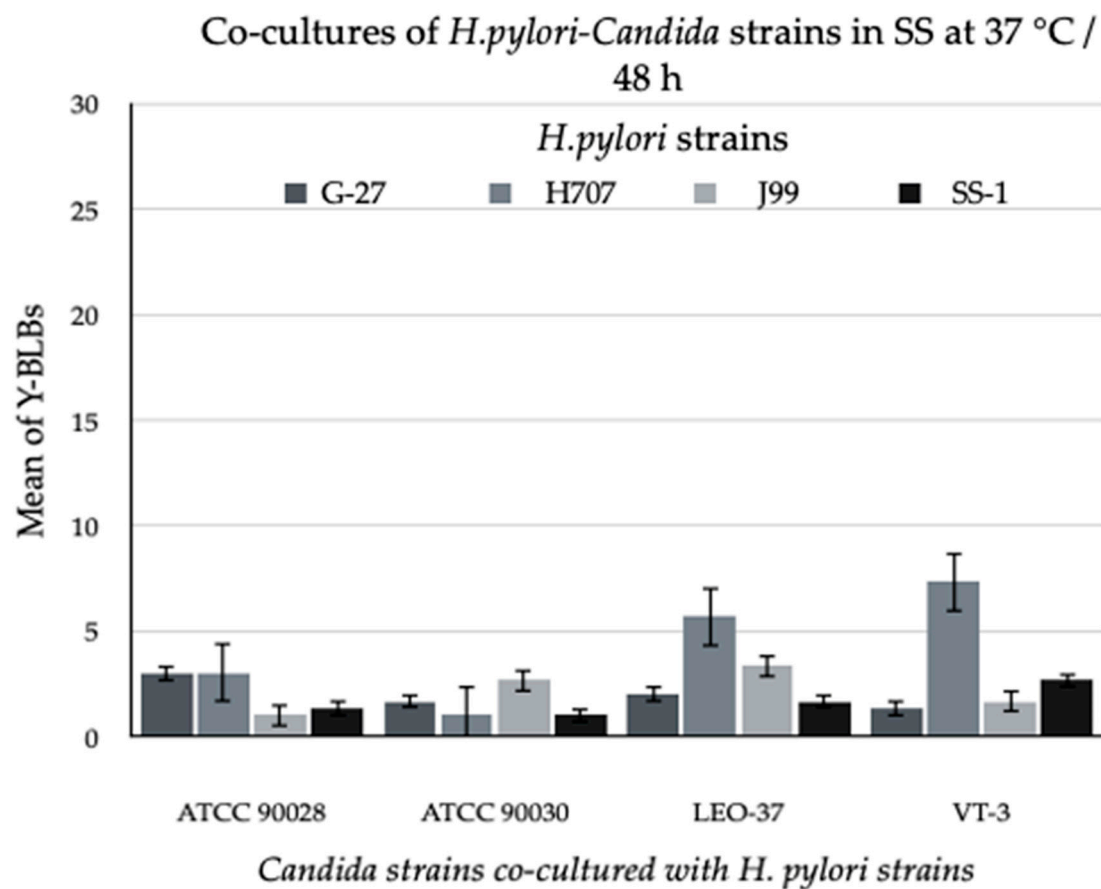

**Supplementary Figure S3.** Means of yeasts cells harboring bacteria like bodies (Y-BLBS) obtained in 48 h co-cultures incubated in saline solution (SS). The higher means of Y-BLBS were found in co-cultures prepared with *Candida*, LEO-37 and VT-3 strains.

**Video S1:** Wet mount observed using an optical microscope, of a *H. pylori*-*Candida* co-culture showing mobile bacteria like bodies within the vacuole of yeast cells. [https://youtu.be/CFGR\\_iproVk](https://youtu.be/CFGR_iproVk)
